# Supplementary material for: Adolescent valuation of CARIES-QC-U: a child-centred preference-based measure of dental caries
Source: Springer Nature journal article supplement (doi:10.1186/s12955-022-01918-w), 2022-02-03
Supplement: MOESM1 [file 20098020]

## **Valuation of CARIES-QC-U: a child-centred preference-based measure of dental caries**

Rogers HJ,<sup>1</sup> Sagebiel J,<sup>2</sup> Marshman Z,<sup>3</sup> Rodd HD,<sup>3</sup> Rowen D<sup>4</sup>

- 1) School of Dental Sciences, Faculty of Medical Sciences, Newcastle University, Newcastle-upon-Tyne, UK
- 2) Julian Sagebiel, Department of Economics, Swedish University of Agricultural Economics, Uppsala, Sweden
- 3) Unit of Oral Health, Dentistry and Society, School of Clinical Dentistry, University of Sheffield, UK
- 4) Health Economics and Decision Science, School of Health and Related Research, University of Sheffield, UK

**Corresponding author:** Helen J Rogers (ORCID: 0000-0001-5031-5009), School of Dental Sciences, Newcastle University, UK. Email: [helen.rogers@newcastle.ac.uk](mailto:helen.rogers@newcastle.ac.uk)

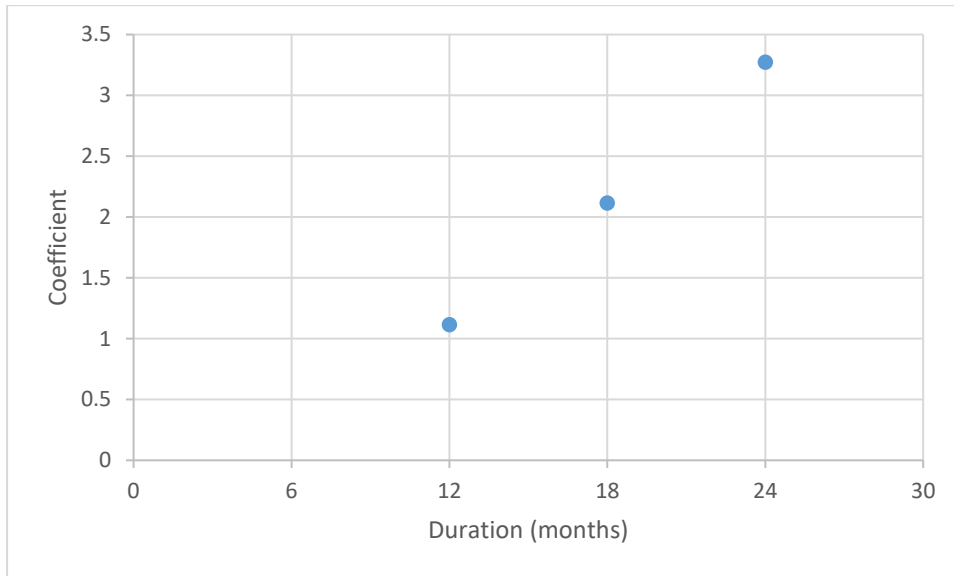

**Figure S1: Plot demonstrating linearity of the duration attribute in the  $DCE_{TTO}$  tasks**

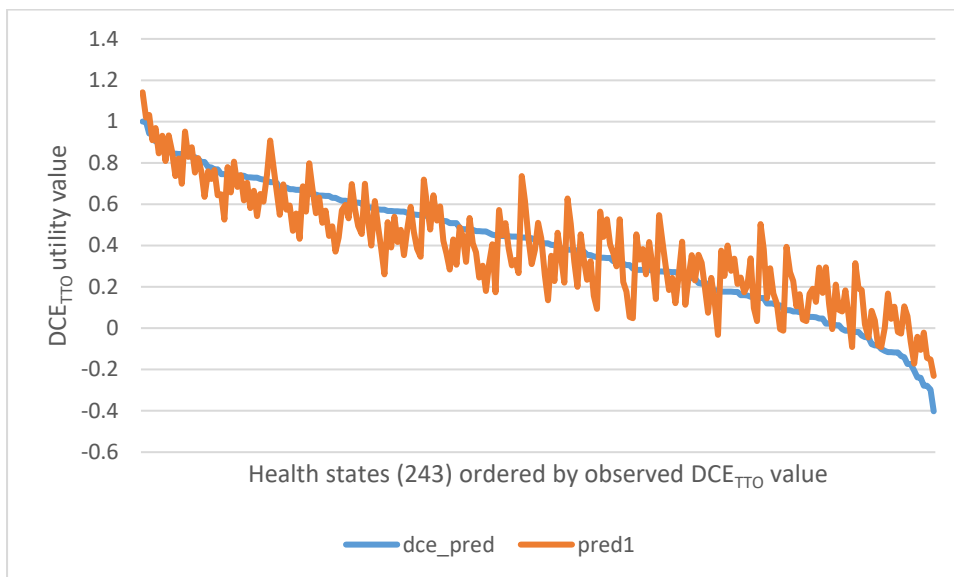

**Figure S2: Plot showing the relationship between the estimated and observed values for the linear model**

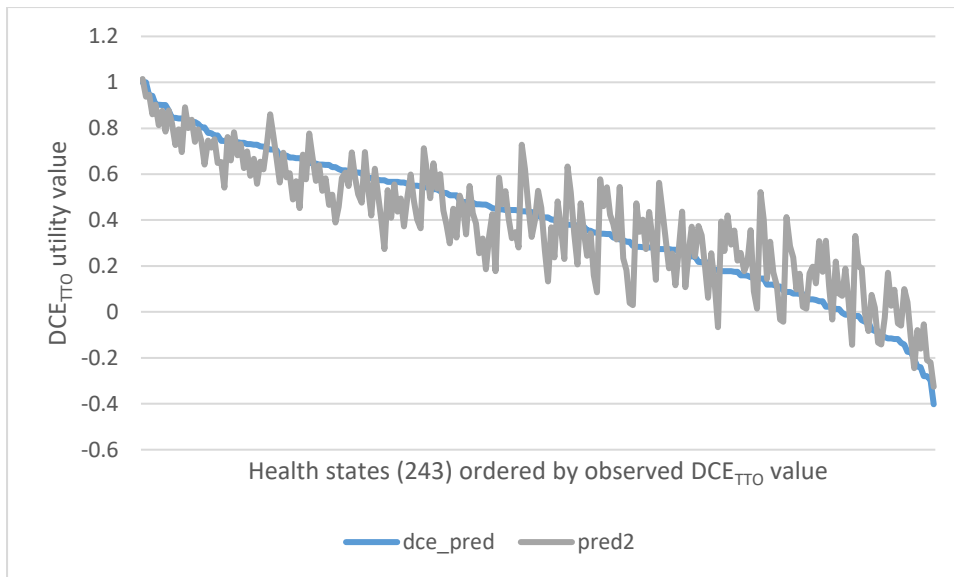

**Figure S3: Plot showing the relationship between the estimated and observed values using the quadratic model**

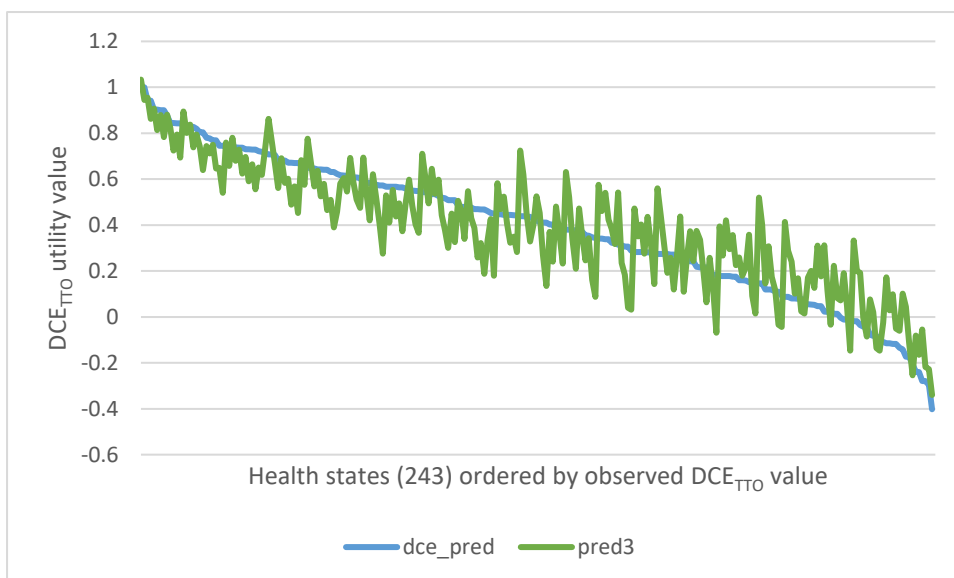

**Figure S4: Plot showing the relationship between the estimated and observed values using the cubic model**

**Table S1: CARIES-QC contains the 13 questions shown here alongside the related items and response levels (reproduced from Rogers et al, 2020)**

| <b>Question from CARIES-QC</b>                                      | <b>Item</b> | <b>Response levels</b>       |
|---------------------------------------------------------------------|-------------|------------------------------|
| How much do your teeth hurt you?                                    | Hurt        | Not at all<br>A bit<br>A lot |
| Do your teeth make it hard to eat some foods?                       | Hard to eat | Not at all<br>A bit<br>A lot |
| Do you have to eat on one side of your mouth because of your teeth? | One side    | Not at all<br>A bit<br>A lot |
| Do you get food stuck in your teeth?                                | Food stuck  | Not at all<br>A bit<br>A lot |
| How much do you get kept awake by your teeth?                       | Kept awake  | Not at all<br>A bit<br>A lot |
| How much do your teeth annoy you?                                   | Annoy       | Not at all<br>A bit<br>A lot |
| How much do your teeth hurt when you brush them?                    | Brushing    | Not at all<br>A bit<br>A lot |
| Do you have to eat more carefully because of your teeth?            | Carefully   | Not at all<br>A bit<br>A lot |
| Do you have to eat more slowly because of your teeth?               | Slowly      | Not at all<br>A bit<br>A lot |
| Do you feel cross because of your teeth?                            | Cross       | Not at all<br>A bit<br>A lot |
| How much have you cried because of your teeth?                      | Cried       | Not at all<br>A bit<br>A lot |
| Do your teeth make it hard to do your schoolwork?                   | School      | Not at all<br>A bit<br>A lot |
| How much of a problem are your teeth for you?                       | Global      | Not at all<br>A bit<br>A lot |

**Table S2: Marginal choice frequencies for data obtained from soft launch of adolescent BWS survey**

| <b>Attribute</b> | <b>Descriptor</b>                              | <b>Best</b>  | <b>Worst</b> |
|------------------|------------------------------------------------|--------------|--------------|
| <b>Hurt1</b>     | My teeth do not hurt me at all                 | <b>0.602</b> | 0.050        |
| <b>Hurt2</b>     | My teeth hurt me a bit                         | 0.068        | 0.166        |
| <b>Hurt3</b>     | My teeth hurt me a lot                         | 0.030        | 0.474        |
| <b>Annoy1</b>    | My teeth do not annoy me at all                | 0.479        | 0.114        |
| <b>Annoy2</b>    | My teeth annoy me a bit                        | 0.183        | 0.087        |
| <b>Annoy3</b>    | My teeth annoy me a lot                        | 0.090        | 0.195        |
| <b>Awake1</b>    | My teeth do not keep me awake at all           | 0.328        | 0.073        |
| <b>Awake2</b>    | My teeth keep me awake a bit                   | 0.048        | 0.160        |
| <b>Awake3</b>    | My teeth keep me awake a lot                   | 0.050        | 0.307        |
| <b>Eat1</b>      | My teeth do not make it hard to eat some foods | 0.350        | 0.120        |
| <b>Eat2</b>      | My teeth make it a bit hard to eat some foods  | 0.171        | 0.159        |
| <b>Eat3</b>      | My teeth make it really hard to eat some foods | 0.093        | 0.272        |
| <b>Cry1</b>      | My teeth do not make me cry at all             | 0.466        | 0.071        |
| <b>Cry2</b>      | My teeth make me cry a bit                     | 0.027        | 0.224        |
| <b>Cry3</b>      | My teeth make me cry a lot                     | 0.027        | <b>0.521</b> |

Notes: Highest best and worst frequencies are displayed in **bold**. Hurt1: my teeth do not hurt me at all; Hurt2: my teeth hurt me a bit; Hurt3: my teeth hurt me a lot; Annoy1: my teeth do not annoy me at all; Annoy2: my teeth annoy me a bit; Annoy3: my teeth annoy me a lot; Awake1: my teeth do not keep me awake at all; Awake2: my teeth keep me awake a bit; Awake3: my teeth keep me awake a lot; Eat1: my teeth do not make it hard to eat some foods; Eat2: my teeth make it a bit hard to eat some foods; Eat3: my teeth make it really hard to eat some foods; Cry1: my teeth do not make me cry at all; Cry2: my teeth make me cry a bit; Cry3: my teeth make me cry a lot

**Table S3: Regression results and anchored utility decrements using soft launch data of DCE<sub>TTO</sub> survey for CARIES-QC-U**

| <b>Variables</b>      | <b>Estimated regressions</b> | <b>Anchored values</b> |
|-----------------------|------------------------------|------------------------|
| <b>Hurt2_LY</b>       | -0.066***<br>(0.000)         | -0.172                 |
| <b>Hurt3_LY</b>       | -0.228***<br>(0.000)         | -0.590                 |
| <b>Annoy2_LY</b>      | 0.001<br>(0.978)             | 0.002                  |
| <b>Annoy3_LY</b>      | -0.049**<br>(0.016)          | -0.126                 |
| <b>Awake2_LY</b>      | -0.020<br>(0.314)            | -0.051                 |
| <b>Awake3_LY</b>      | -0.114***<br>(0.000)         | -0.295                 |
| <b>Eat2_LY</b>        | -0.026<br>(0.207)            | -0.068                 |
| <b>Eat3_LY</b>        | -0.072***<br>(0.001)         | -0.188                 |
| <b>Cry2_LY</b>        | -0.050**<br>(0.014)          | -0.130                 |
| <b>Cry3_LY</b>        | -0.146***<br>(0.000)         | -0.378                 |
| <b>LY</b>             | 0.386***<br>(0.000)          |                        |
| <b>Observations</b>   | 1,818                        |                        |
| <b>Log likelihood</b> | -500.6                       |                        |
| <b>Rho-squared</b>    | 0.205                        |                        |

Notes: p-values are in parentheses, where \*\*\* p<0.01, \*\* p<0.05, \* p<0.1. An underscore (\_) represents an interaction between variables i.e. Hurt2\_LY is Hurt2 multiplied by LY. Hurt2:my teeth hurt me a bit; Hurt3: my teeth hurt me a lot; Annoy2: my teeth annoy me a bit; Annoy3: my teeth annoy me a lot; Awake2: my teeth keep me awake a bit; Awake3: my teeth keep me awake a lot; Eat2: my teeth make it a bit hard to eat some foods; Eat3: my teeth make it really hard to eat some foods; Cry2: my teeth make me cry a bit; Cry3: my teeth make me cry a lot; LY: duration

**Table S4: Sociodemographic characteristics of adult participants in the soft launch of the DCE<sub>TO</sub> survey**

| <b>Sociodemographic and health characteristics</b> | <b>Adults n=99 (%)</b> | <b>Population norms %</b> |
|----------------------------------------------------|------------------------|---------------------------|
| <b>Gender</b>                                      |                        |                           |
| Male                                               | 58 (57.4)              | 49.1 <sup>a</sup>         |
| Female                                             | 43 (42.6)              | 50.9 <sup>a</sup>         |
| Other                                              | 0 (0.00)               | -                         |
| <b>Age</b>                                         |                        |                           |
| 18-24                                              | 1 (1.0)                | 12.0 <sup>b</sup>         |
| 25-34                                              | 6 (6.0)                | 17.0 <sup>b</sup>         |
| 35-44                                              | 14 (13.9)              | 17.7 <sup>b</sup>         |
| 45-64                                              | 50 (49.5)              | 32.5 <sup>b</sup>         |
| 65+                                                | 30 (29.7)              | 20.8 <sup>b</sup>         |
| Prefer not to say                                  | -                      | -                         |
| <b>Ethnicity</b>                                   |                        |                           |
| White                                              | 96 (95.1)              | 87.2 <sup>a</sup>         |
| Asian/Asian British                                | 0 (0.0)                | 6.2 <sup>a</sup>          |
| Black/African/Caribbean/Black British              | 2 (2.0)                | 3.0 <sup>a</sup>          |
| Mixed/Multiple ethnic groups                       | 2 (2.0)                | -                         |
| Other ethnic group                                 | 0 (0.0)                | 2.9 <sup>a</sup>          |
| Prefer not to say                                  | 1 (1.0)                | -                         |
| <b>Main activity</b>                               |                        |                           |
| In employment or self-employment                   | 45 (44.6)              | 61.7 <sup>c</sup>         |
| Retired                                            | 32 (31.7)              | 13.9 <sup>c</sup>         |
| Housework                                          | 7 (6.9)                | 4.3 <sup>c</sup>          |
| Student                                            | 2 (2.0)                | 9.3 <sup>c</sup>          |
| Seeking work/unemployed                            | 6 (5.9)                | 4.4 <sup>c</sup>          |
| Long term sick                                     | 5 (5.0)                | 4.3 <sup>c</sup>          |
| Prefer not to say                                  | 1 (1.0)                | -                         |
| Other                                              | 3 (3.0)                | 2.2 <sup>c</sup>          |
| <b>Marital status</b>                              |                        |                           |
| Single                                             | 21 (20.8)              | 35.9 <sup>a</sup>         |
| Married/partner                                    | 68 (67.3)              | 47.0 <sup>a</sup>         |
| Separated/divorced                                 | 8 (7.9)                | 7.7 <sup>a</sup>          |
| Widowed                                            | 3 (3.0)                | 9.4 <sup>a</sup>          |
| Prefer not to say                                  | 1 (1.0)                | -                         |

Notes: <sup>a</sup>=proportion of total UK population <sup>b</sup>=proportion of UK adult population (aged over 18 years)  
<sup>c</sup>=proportion of English adult population (aged over 16 years)

**Table S5: Health-related characteristics of adult participants in the soft launch of the DCE<sub>TO</sub> survey**

| <b>Health characteristics</b>                                                                                             | <b>Adults n=99 (%)</b> |
|---------------------------------------------------------------------------------------------------------------------------|------------------------|
| <b>Self-reported general health: in general, how would you rate your health today?</b>                                    |                        |
| Very good                                                                                                                 | 12 (11.9)              |
| Good                                                                                                                      | 53 (52.5)              |
| OK                                                                                                                        | 29 (28.7)              |
| Bad                                                                                                                       | 6 (5.9)                |
| Very bad                                                                                                                  | 1 (1.0)                |
| <b>Self-reported dental health: how much of a problem are your teeth for you today?</b>                                   |                        |
| Not at all                                                                                                                | 53 (52.5)              |
| A bit                                                                                                                     | 37 (36.6)              |
| A lot                                                                                                                     | 11 (10.9)              |
| <b>Self-reported caries experience: have you ever had a filling or a tooth taken out because it had a hole or cavity?</b> |                        |
| Yes                                                                                                                       | 85 (84.2)              |
| No                                                                                                                        | 16 (15.8)              |
| <b>Participant understanding</b>                                                                                          |                        |
| <b>Did you find the tasks:</b>                                                                                            |                        |
| Easy to understand                                                                                                        | 68 (67.3)              |
| Somewhere in the middle                                                                                                   | 2 (2.0)                |
| Difficult to understand                                                                                                   | 31 (30.7)              |
| <b>Did you find it:</b>                                                                                                   |                        |
| Easy to choose an answer                                                                                                  | 43 (42.6)              |
| Somewhere in the middle                                                                                                   | 18 (17.8)              |
| Difficult to choose an answer                                                                                             | 40 (39.6)              |



**Table S6: Self-reported general health and dental health of participants in the adolescent BWS and adult DCE<sub>TTO</sub> surveys**

| <b>Health-related characteristics</b>                                                                                     | <b>Adolescents n=723 (%)</b> | <b>Adults n=626 (%)</b> |
|---------------------------------------------------------------------------------------------------------------------------|------------------------------|-------------------------|
| <b>Self-reported general health: in general, how would you rate your health today?</b>                                    |                              |                         |
| Very good                                                                                                                 | 383 (53.0)                   | 126 (20.1)              |
| Good                                                                                                                      | 272 (37.6)                   | 297 (47.4)              |
| OK                                                                                                                        | 59 (8.2)                     | 154 (24.6)              |
| Bad                                                                                                                       | 9 (1.2)                      | 41 (6.6)                |
| Very bad                                                                                                                  | 0 (0.0)                      | 8 (1.3)                 |
| <b>Self-reported dental health: how much of a problem are your teeth for you today?</b>                                   |                              |                         |
| Not at all                                                                                                                | 450 (62.2)                   | 316 (50.5)              |
| A bit                                                                                                                     | 249 (34.4)                   | 271 (43.3)              |
| A lot                                                                                                                     | 24 (3.3)                     | 39 (6.2)                |
| <b>Self-reported caries experience: have you ever had a filling or a tooth taken out because it had a hole or cavity?</b> |                              |                         |
| Yes                                                                                                                       | 350 (48.4)                   | 498 (79.6)              |
| No                                                                                                                        | 373 (51.6)                   | 128 (20.5)              |
| <b>How much do your teeth hurt you?</b>                                                                                   |                              |                         |
| Not at all                                                                                                                | 573 (79.3)                   | 452 (72.2)              |
| A bit                                                                                                                     | 134 (18.5)                   | 163 (26.0)              |
| A lot                                                                                                                     | 16 (2.2)                     | 11 (1.8)                |
| <b>How much do your teeth annoy you?</b>                                                                                  |                              |                         |
| Not at all                                                                                                                | 479 (66.3)                   | 340 (54.3)              |
| A bit                                                                                                                     | 220 (30.4)                   | 239 (38.2)              |
| A lot                                                                                                                     | 24 (3.3)                     | 47 (7.5)                |
| <b>How much do you get kept awake by your teeth?</b>                                                                      |                              |                         |
| Not at all                                                                                                                | 617 (85.3)                   | 562 (89.8)              |
| A bit                                                                                                                     | 90 (12.5)                    | 56 (9.0)                |
| A lot                                                                                                                     | 16 (2.2)                     | 8 (1.3)                 |
| <b>Do your teeth make it hard to eat some foods</b>                                                                       |                              |                         |
| Not at all                                                                                                                | 550 (76.1)                   | 374 (59.7)              |
| A bit                                                                                                                     | 151 (20.9)                   | 214 (34.2)              |
| A lot                                                                                                                     | 22 (3.0)                     | 38 (6.1)                |
| <b>How much have you cried about your teeth?</b>                                                                          |                              |                         |
| Not at all                                                                                                                | 604 (83.5)                   | 546 (87.2)              |
| A bit                                                                                                                     | 106 (14.7)                   | 67 (10.7)               |
| A lot                                                                                                                     | 13 (1.8)                     | 13 (2.1)                |

**Table S7: Participants' self-reported difficulty of understanding, difficulty of choice and ability to pass the dominance test**

| <b>Participant understanding</b>      | <b>Adolescents n=723 (%)</b>                            | <b>Adults n=626 (%)</b>                                   |
|---------------------------------------|---------------------------------------------------------|-----------------------------------------------------------|
| <b>Did you find the tasks:</b>        |                                                         |                                                           |
| Easy to understand                    | 501 (69.3)                                              | 451 (72.0)                                                |
| Somewhere in the middle               | 171 (23.7)                                              | 39 (6.2)                                                  |
| Difficult to understand               | 51 (7.1)                                                | 136 (21.9)                                                |
| <b>Did you find it:</b>               |                                                         |                                                           |
| Easy to choose an answer              | 440 (60.9)                                              | 277 (44.3)                                                |
| Somewhere in the middle               | 215 (29.7)                                              | 104 (16.6)                                                |
| Difficult to choose an answer         | 68 (9.4)                                                | 245 (39.1)                                                |
| <b>Dominance test</b>                 |                                                         |                                                           |
| Pass*                                 | 389 (53.8)                                              | 578 (92.3)                                                |
| Correctly identified 'best' attribute | 604 (83.5)                                              | -                                                         |
| <b>Second attempt requested</b>       | <b>n=38</b>                                             | <b>n=26</b>                                               |
| Pass*                                 | 12 (31.6) of which 0 (0.0) had failed the first attempt | 23 (92.0) of which 18 (78.3) had failed the first attempt |
| Correctly identified 'best' attribute | 34 (89.5)                                               | -                                                         |

Notes: \*both 'best' and 'worst' attributes needed to be identified correctly for adolescents to 'pass' the BWS dominance test. NB. There is no agreed dominance test for BWS.

**Table S8: Marginal choice frequencies for data obtained from adolescent BWS survey**

| <b>Variables</b> | <b>Descriptor</b>                              | <b>Best</b>  | <b>Worst</b> |
|------------------|------------------------------------------------|--------------|--------------|
| <b>Hurt1</b>     | My teeth do not hurt me at all                 | <b>0.614</b> | 0.047        |
| <b>Hurt2</b>     | My teeth hurt me a bit                         | 0.087        | 0.166        |
| <b>Hurt3</b>     | My teeth hurt me a lot                         | 0.040        | 0.489        |
| <b>Annoy1</b>    | My teeth do not annoy me at all                | 0.404        | 0.074        |
| <b>Annoy2</b>    | My teeth annoy me a bit                        | 0.171        | 0.121        |
| <b>Annoy3</b>    | My teeth annoy me a lot                        | 0.079        | 0.206        |
| <b>Awake1</b>    | My teeth do not keep me awake at all           | 0.341        | 0.081        |
| <b>Awake2</b>    | My teeth keep me awake a bit                   | 0.074        | 0.141        |
| <b>Awake3</b>    | My teeth keep me awake a lot                   | 0.056        | 0.305        |
| <b>Eat1</b>      | My teeth do not make it hard to eat some foods | 0.346        | 0.107        |
| <b>Eat2</b>      | My teeth make it a bit hard to eat some foods  | 0.156        | 0.168        |
| <b>Eat3</b>      | My teeth make it really hard to eat some foods | 0.077        | 0.277        |
| <b>Cry1</b>      | My teeth do not make me cry at all             | 0.455        | 0.070        |
| <b>Cry2</b>      | My teeth make me cry a bit                     | 0.052        | 0.247        |
| <b>Cry3</b>      | My teeth make me cry a lot                     | 0.044        | <b>0.502</b> |

Notes: highest best and worst frequencies are displayed in **bold**. Hurt1: my teeth do not hurt me at all; Hurt2: my teeth hurt me a bit; Hurt3: my teeth hurt me a lot; Annoy1: my teeth do not annoy me at all; Annoy2: my teeth annoy me a bit; Annoy3: my teeth annoy me a lot; Awake1: my teeth do not keep me awake at all; Awake2: my teeth keep me awake a bit; Awake3: my teeth keep me awake a lot; Eat1: my teeth do not make it hard to eat some foods; Eat2: my teeth make it a bit hard to eat some foods; Eat3: my teeth make it really hard to eat some foods; Cry1: my teeth do not make me cry at all; Cry2: my teeth make me cry a bit; Cry3: my teeth make me cry a lot



|                       |        |       |       |        |        |       |       |
|-----------------------|--------|-------|-------|--------|--------|-------|-------|
| <b>Observations</b>   | 56,870 | 8,480 | 9,920 | 12,160 | 10,080 | 9,840 | 7,200 |
| <b>Log likelihood</b> | -14362 | -2104 | -2381 | -3343  | -2493  | -2471 | -1735 |
| <b>Rho-squared</b>    | 0.215  | 0.235 | 0.259 | 0.158  | 0.236  | 0.224 | 0.263 |

---

Notes: p-values are in parentheses, where \*\*\* p<0.01, \*\* p<0.05, \* p<0.1. Hurt1: my teeth do not hurt me at all; Hurt2:my teeth hurt me a bit; Hurt3: my teeth hurt me a lot; Annoy1: my teeth do not annoy me at all; Annoy2: my teeth annoy me a bit; Annoy3: my teeth annoy me a lot; Awake1: my teeth do not keep me awake at all; Awake2: my teeth keep me awake a bit; Awake3: my teeth keep me awake a lot; Eat1: my teeth do not make it hard to eat some foods; Eat2: my teeth make it a bit hard to eat some foods; Eat3: my teeth make it really hard to eat some foods; Cry1: my teeth do not make me cry at all; Cry2: my teeth make me cry a bit; Cry3: my teeth make me cry a lot

**Table S10: Regression results when using the reduced sample approach to explore heterogeneity in the BWS data relating to participant gender, self-reported general and dental health, and previous caries experience**

| <b>Variables</b> | <b>Standard model</b> | <b>Male gender</b>   | <b>Bad or very bad general health</b> | <b>Current dental problems</b> | <b>Previous caries experience</b> |
|------------------|-----------------------|----------------------|---------------------------------------|--------------------------------|-----------------------------------|
| <b>Hurt1</b>     | -                     | -                    | -                                     | -                              | -                                 |
| <b>Hurt2</b>     | -2.235***<br>(0.000)  | -2.272***<br>(0.000) | -3.105***<br>(0.000)                  | -1.594***<br>(0.000)           | -1.921***<br>(0.000)              |
| <b>Hurt3</b>     | -3.406***<br>(0.000)  | -3.434***<br>(0.000) | -4.914***<br>(0.000)                  | -2.592***<br>(0.000)           | -3.199***<br>(0.000)              |
| <b>Annoy1</b>    | -0.959***<br>(0.000)  | -0.937***<br>(0.000) | -1.580***<br>(0.002)                  | -0.552***<br>(0.000)           | -0.733***<br>(0.000)              |
| <b>Annoy2</b>    | -1.989***<br>(0.000)  | -1.958***<br>(0.000) | -3.529***<br>(0.005)                  | -1.063***<br>(0.000)           | -1.637***<br>(0.000)              |
| <b>Annoy3</b>    | -2.720***<br>(0.000)  | -2.632***<br>(0.000) | -4.028***<br>(0.010)                  | -1.670***<br>(0.000)           | -2.215***<br>(0.000)              |
| <b>Awake1</b>    | -0.866***<br>(0.000)  | -0.830***<br>(0.000) | -1.452***<br>(0.012)                  | -0.460***<br>(0.000)           | -0.704***<br>(0.000)              |
| <b>Awake2</b>    | -2.322***<br>(0.000)  | -2.263***<br>(0.000) | -3.439***<br>(0.000)                  | -1.395***<br>(0.000)           | -1.892***<br>(0.000)              |
| <b>Awake3</b>    | -2.827***<br>(0.000)  | -2.584***<br>(0.000) | -19.060***<br>(0.000)                 | -1.773***<br>(0.000)           | -2.293***<br>(0.000)              |
| <b>Eat1</b>      | -0.949***<br>(0.000)  | -0.937***<br>(0.000) | -1.359*<br>(0.076)                    | -0.430***<br>(0.000)           | -0.751***<br>(0.000)              |
| <b>Eat2</b>      | -1.874***<br>(0.000)  | -1.790***<br>(0.000) | -2.100***<br>(0.012)                  | -1.148***<br>(0.000)           | -1.534***<br>(0.000)              |
| <b>Eat3</b>      | -2.543***<br>(0.000)  | -2.360***<br>(0.000) | -3.488***<br>(0.003)                  | -1.678***<br>(0.000)           | -2.155***<br>(0.000)              |
| <b>Cry1</b>      | -0.266***<br>(0.000)  | -0.302***<br>(0.000) | -0.671<br>(0.159)                     | -0.075<br>(0.390)              | -0.216***<br>(0.006)              |
| <b>Cry2</b>      | -2.039***<br>(0.000)  | -2.016***<br>(0.000) | -2.549***<br>(0.001)                  | -1.535***<br>(0.000)           | -1.841***<br>(0.000)              |
| <b>Cry3</b>      | -3.097***<br>(0.000)  | -2.988***<br>(0.000) | -4.593***<br>(0.000)                  | -2.312***<br>(0.000)           | -2.857***<br>(0.000)              |

|                       |        |        |        |        |        |
|-----------------------|--------|--------|--------|--------|--------|
| <b>Observations</b>   | 56,870 | 30,960 | 720    | 21,840 | 28,000 |
| <b>Log likelihood</b> | -14362 | -8019  | -145.8 | -6277  | -7535  |
| <b>Rho-squared</b>    | 0.215  | 0.201  | 0.371  | 0.120  | 0.171  |

---

Notes: p-values are in parentheses, where \*\*\* p<0.01, \*\* p<0.05, \* p<0.1. Hurt1: my teeth do not hurt me at all; Hurt2:my teeth hurt me a bit; Hurt3: my teeth hurt me a lot; Annoy1: my teeth do not annoy me at all; Annoy2: my teeth annoy me a bit; Annoy3: my teeth annoy me a lot; Awake1: my teeth do not keep me awake at all; Awake2: my teeth keep me awake a bit; Awake3: my teeth keep me awake a lot; Eat1: my teeth do not make it hard to eat some foods; Eat2: my teeth make it a bit hard to eat some foods; Eat3: my teeth make it really hard to eat some foods; Cry1: my teeth do not make me cry at all; Cry2: my teeth make me cry a bit; Cry3: my teeth make me cry a lot

**Table S11: The impact of sociodemographic and health-related interaction terms in the DCE<sub>TTO</sub> survey results**

|           | Male participants | Self-reported current dental problems | Previous caries experience | Employed participants | Married participants | Participants with bad or very bad general health | Participants aged 65 and over | Participants aged 18-24 |
|-----------|-------------------|---------------------------------------|----------------------------|-----------------------|----------------------|--------------------------------------------------|-------------------------------|-------------------------|
| Hurt2_LY  |                   | +                                     |                            |                       | +                    | -                                                |                               |                         |
| Hurt3_LY  | +                 | +                                     |                            |                       | +                    | -                                                | -                             |                         |
| Annoy2_LY |                   | +                                     |                            |                       |                      |                                                  |                               |                         |
| Annoy3_LY |                   | +                                     |                            |                       |                      |                                                  | -                             |                         |
| Awake2_LY |                   |                                       |                            |                       |                      |                                                  |                               |                         |
| Awake3_LY | +                 | +                                     |                            |                       |                      |                                                  |                               |                         |
| Eat2_LY   |                   | +                                     |                            |                       |                      |                                                  |                               |                         |
| Eat3_LY   |                   | +                                     |                            | +                     |                      |                                                  |                               | -                       |
| Cry2_LY   |                   | +                                     |                            |                       |                      |                                                  | -                             |                         |
| Cry3_LY   |                   | +                                     |                            | +                     |                      |                                                  | -                             |                         |

Notes: + a positive, statistically significant ( $p \leq 0.05$ ) coefficient – a negative, statistically significant ( $p \leq 0.05$ ) coefficient. An underscore ( ) represents an interaction between variables i.e. Hurt2\_LY is Hurt2 multiplied by LY. Hurt2: my teeth hurt me a bit; Hurt3: my teeth hurt me a lot; Annoy2: my teeth annoy me a bit; Annoy3: my teeth annoy me a lot; Awake2: my teeth keep me awake a bit; Awake3: my teeth keep me awake a lot; Eat2: my teeth make it a bit hard to eat some foods; Eat3: my teeth make it really hard to eat some foods; Cry2: my teeth make me cry a bit; Cry3: my teeth make me cry a lot; LY: duration



**Table S12: Regression results exploring the BWS model robustness to exclusion of adolescent participants who failed the dominance test, difficulty understanding or difficulty of choice**

| <b>Variables</b> | <b>Standard model</b> | <b>Robustness 1</b><br>Excluding participants that failed the dominance test <sup>†</sup> first time | <b>Robustness 2</b><br>Excluding participants that found it difficult to understand the tasks | <b>Robustness 3</b><br>Excluding participants that failed the dominance test <sup>†</sup> and found it difficult to understand the tasks | <b>Robustness 4</b><br>Excluding participants that found it difficult to choose an answer | <b>Robustness 5</b><br>Excluding participants that failed the dominance test <sup>†</sup> and found it difficult to choose an answer |
|------------------|-----------------------|------------------------------------------------------------------------------------------------------|-----------------------------------------------------------------------------------------------|------------------------------------------------------------------------------------------------------------------------------------------|-------------------------------------------------------------------------------------------|--------------------------------------------------------------------------------------------------------------------------------------|
| <b>Hurt1</b>     | -                     | -                                                                                                    | -                                                                                             | -                                                                                                                                        | -                                                                                         | -                                                                                                                                    |
| <b>Hurt2</b>     | -2.235***<br>(0.000)  | -3.322***<br>(0.000)                                                                                 | -2.361***<br>(0.000)                                                                          | -3.383***<br>(0.000)                                                                                                                     | -2.389***<br>(0.000)                                                                      | -3.411***<br>(0.000)                                                                                                                 |
| <b>Hurt3</b>     | -3.406***<br>(0.000)  | -4.918***<br>(0.000)                                                                                 | -3.614***<br>(0.000)                                                                          | -5.132***<br>(0.000)                                                                                                                     | -3.641***<br>(0.000)                                                                      | -5.178***<br>(0.000)                                                                                                                 |
| <b>Annoy1</b>    | -0.959***<br>(0.000)  | -1.569***<br>(0.000)                                                                                 | -1.018***<br>(0.000)                                                                          | -1.569***<br>(0.000)                                                                                                                     | -1.036***<br>(0.000)                                                                      | -1.583***<br>(0.000)                                                                                                                 |
| <b>Annoy2</b>    | -1.989***<br>(0.000)  | -3.418***<br>(0.000)                                                                                 | -2.146***<br>(0.000)                                                                          | -3.482***<br>(0.000)                                                                                                                     | -2.172***<br>(0.000)                                                                      | -3.500***<br>(0.000)                                                                                                                 |
| <b>Annoy3</b>    | -2.720***<br>(0.000)  | -4.619***<br>(0.000)                                                                                 | -2.922***<br>(0.000)                                                                          | -4.643***<br>(0.000)                                                                                                                     | -2.968***<br>(0.000)                                                                      | -4.696***<br>(0.000)                                                                                                                 |
| <b>Awake1</b>    | -0.866***<br>(0.000)  | -1.517***<br>(0.000)                                                                                 | -0.929***<br>(0.000)                                                                          | -1.513***<br>(0.000)                                                                                                                     | -0.947***<br>(0.000)                                                                      | -1.532***<br>(0.000)                                                                                                                 |
| <b>Awake2</b>    | -2.322***<br>(0.000)  | -3.938***<br>(0.000)                                                                                 | -2.508***<br>(0.000)                                                                          | -3.992***<br>(0.000)                                                                                                                     | -2.544***<br>(0.000)                                                                      | -4.018***<br>(0.000)                                                                                                                 |
| <b>Awake3</b>    | -2.827***<br>(0.000)  | -5.519***<br>(0.000)                                                                                 | -3.055***<br>(0.000)                                                                          | -5.606***<br>(0.000)                                                                                                                     | -3.085***<br>(0.000)                                                                      | -5.683***<br>(0.000)                                                                                                                 |
| <b>Eat1</b>      | -0.949***<br>(0.000)  | -1.729***<br>(0.000)                                                                                 | -1.027***<br>(0.000)                                                                          | -1.757***<br>(0.000)                                                                                                                     | -1.063***<br>(0.000)                                                                      | -1.802***<br>(0.000)                                                                                                                 |
| <b>Eat2</b>      | -1.874***<br>(0.000)  | -3.167***<br>(0.000)                                                                                 | -2.016***<br>(0.000)                                                                          | -3.255***<br>(0.000)                                                                                                                     | -2.037***<br>(0.000)                                                                      | -3.276***<br>(0.000)                                                                                                                 |
| <b>Eat3</b>      | -2.543***<br>(0.000)  | -4.713***<br>(0.000)                                                                                 | -2.731***<br>(0.000)                                                                          | -4.762***<br>(0.000)                                                                                                                     | -2.767***<br>(0.000)                                                                      | -4.785***<br>(0.000)                                                                                                                 |
| <b>Cry1</b>      | -0.266***             | -0.577***                                                                                            | -0.292***                                                                                     | -0.573***                                                                                                                                | -0.285***                                                                                 | -0.576***                                                                                                                            |

|                       |           |           |           |           |           |           |
|-----------------------|-----------|-----------|-----------|-----------|-----------|-----------|
|                       | (0.000)   | (0.000)   | (0.000)   | (0.000)   | (0.000)   | (0.000)   |
| <b>Cry2</b>           | -2.039*** | -3.019*** | -2.122*** | -3.045*** | -2.136*** | -3.065*** |
|                       | (0.000)   | (0.000)   | (0.000)   | (0.000)   | (0.000)   | (0.000)   |
| <b>Cry3</b>           | -3.097*** | -4.965*** | -3.306*** | -5.046*** | -3.345*** | -5.114*** |
|                       | (0.000)   | (0.000)   | (0.000)   | (0.000)   | (0.000)   | (0.000)   |
| <b>Observations</b>   | 56,870    | 31,120    | 53,760    | 29,920    | 52,400    | 29,520    |
| <b>Log likelihood</b> | -14362    | -5857     | -13374    | -5546     | -12942    | -5431     |
| <b>Rho-squared</b>    | 0.215     | 0.415     | 0.235     | 0.424     | 0.239     | 0.428     |

Notes: Robust p-values are in parentheses, where \*\*\*  $p < 0.01$ , \*\*  $p < 0.05$ , \*  $p < 0.1$  †Dominance test was failed if participant was unable to identify the correct ‘best’ and ‘worst’ attributes. Hurt2:my teeth hurt me a bit; Hurt3: my teeth hurt me a lot; Annoy2: my teeth annoy me a bit; Annoy3: my teeth annoy me a lot; Awake2: my teeth keep me awake a bit; Awake3: my teeth keep me awake a lot; Eat2: my teeth make it a bit hard to eat some foods; Eat3: my teeth make it really hard to eat some foods; Cry2: my teeth make me cry a bit; Cry3: my teeth make me cry a lot.

**Table S13: Regression results exploring the BWS model robustness to exclusion of adolescent participants who completed the survey very quickly or very slowly**

| <b>Variables</b> | <b>Standard model</b> | <b>Robustness 6</b><br>Excluding participants that<br>completed the survey in < 3 mins | <b>Robustness 7</b><br>Excluding participants that<br>completed the survey in > 30 mins |
|------------------|-----------------------|----------------------------------------------------------------------------------------|-----------------------------------------------------------------------------------------|
| <b>Hurt1</b>     | -                     | -                                                                                      | -                                                                                       |
| <b>Hurt2</b>     | -2.235***<br>(0.000)  | -2.263***<br>(0.000)                                                                   | -2.234***<br>(0.000)                                                                    |
| <b>Hurt3</b>     | -3.406***<br>(0.000)  | -3.495***<br>(0.000)                                                                   | -3.439***<br>(0.000)                                                                    |
| <b>Annoy1</b>    | -0.959***<br>(0.000)  | -0.976***<br>(0.000)                                                                   | -0.967***<br>(0.000)                                                                    |
| <b>Annoy2</b>    | -1.989***<br>(0.000)  | -2.023***<br>(0.000)                                                                   | -1.999***<br>(0.000)                                                                    |
| <b>Annoy3</b>    | -2.720***<br>(0.000)  | -2.773***<br>(0.000)                                                                   | -2.785***<br>(0.000)                                                                    |
| <b>Awake1</b>    | -0.866***<br>(0.000)  | -0.878***<br>(0.000)                                                                   | -0.865***<br>(0.000)                                                                    |
| <b>Awake2</b>    | -2.322***<br>(0.000)  | -2.356***<br>(0.000)                                                                   | -2.357***<br>(0.000)                                                                    |
| <b>Awake3</b>    | -2.827***<br>(0.000)  | -2.896***<br>(0.000)                                                                   | -2.868***<br>(0.000)                                                                    |
| <b>Eat1</b>      | -0.949***<br>(0.000)  | -0.966***<br>(0.000)                                                                   | -0.962***<br>(0.000)                                                                    |
| <b>Eat2</b>      | -1.874***<br>(0.000)  | -1.903***<br>(0.000)                                                                   | -1.904***<br>(0.000)                                                                    |
| <b>Eat3</b>      | -2.543***<br>(0.000)  | -2.587***<br>(0.000)                                                                   | -2.578***<br>(0.000)                                                                    |
| <b>Cry1</b>      | -0.266***<br>(0.000)  | -0.270***<br>(0.000)                                                                   | -0.289***<br>(0.000)                                                                    |

|                       |                      |                      |                      |
|-----------------------|----------------------|----------------------|----------------------|
| <b>Cry2</b>           | -2.039***<br>(0.000) | -2.064***<br>(0.000) | -2.064***<br>(0.000) |
| <b>Cry3</b>           | -3.097***<br>(0.000) | -3.174***<br>(0.000) | -3.121***<br>(0.000) |
| <b>Observations</b>   | 56,870               | 56,230               | 54,400               |
| <b>Log likelihood</b> | -14362               | -14080               | -13678               |
| <b>Rho-squared</b>    | 0.215                | 0.222                | 0.219                |

Notes: p-values are in parentheses, where \*\*\* p<0.01, \*\* p<0.05, \* p<0.1. Hurt1: my teeth do not hurt me at all; Hurt2:my teeth hurt me a bit; Hurt3: my teeth hurt me a lot; Annoy1: my teeth do not annoy me at all; Annoy2: my teeth annoy me a bit; Annoy3: my teeth annoy me a lot; Awake1: my teeth do not keep me awake at all; Awake2: my teeth keep me awake a bit; Awake3: my teeth keep me awake a lot; Eat1: my teeth do not make it hard to eat some foods; Eat2: my teeth make it a bit hard to eat some foods; Eat3: my teeth make it really hard to eat some foods; Cry1: my teeth do not make me cry at all; Cry2: my teeth make me cry a bit; Cry3: my teeth make me cry a lot

**Table S14: Regression results exploring model robustness to exclusion of adult participants who failed the dominance test or had difficulty understanding the DCE<sub>TTO</sub> tasks**

| <b>Variables</b> | <b>Standard model</b> | <b>Standard model anchored</b> | <b>Robustness 1</b><br>Excluding participants that failed the dominance test | <b>Robustness 1 anchored</b> | <b>Robustness 2</b><br>Excluding participants that found it difficult to understand the tasks | <b>Robustness 2 anchored</b> | <b>Robustness 3</b><br>Excluding participants that failed the dominance test and found it difficult to understand the tasks | <b>Robustness 3 anchored</b> |
|------------------|-----------------------|--------------------------------|------------------------------------------------------------------------------|------------------------------|-----------------------------------------------------------------------------------------------|------------------------------|-----------------------------------------------------------------------------------------------------------------------------|------------------------------|
| <b>Hurt2_LY</b>  | -0.373***<br>(0.000)  | -.1728429<br>(0.000)           | -0.425***<br>(0.000)                                                         | -.1742738<br>(0.000)         | -0.389***<br>(0.000)                                                                          | -.1729981<br>(0.000)         | -0.398***<br>(0.000)                                                                                                        | -.1733476<br>(0.000)         |
| <b>Hurt3_LY</b>  | -1.217***<br>(0.000)  | -.5635363<br>(0.000)           | -1.354***<br>(0.000)                                                         | -.5548113<br>(0.000)         | -1.283***<br>(0.000)                                                                          | -.5708403<br>(0.000)         | -1.315***<br>(0.000)                                                                                                        | -.5722786<br>(0.000)         |
| <b>Annoy2_LY</b> | 0.009<br>(0.820)      | .004016<br>(0.821)             | -0.034<br>(0.414)                                                            | -.0137991<br>(0.409)         | -0.032<br>(0.460)                                                                             | -.014017<br>(0.455)          | -0.031<br>(0.472)                                                                                                           | -.0135733<br>(0.468)         |
| <b>Annoy3_LY</b> | -0.262***<br>(0.000)  | -.1212449<br>(0.000)           | -0.313***<br>(0.000)                                                         | -.1280649<br>(0.000)         | -0.289***<br>(0.000)                                                                          | -.1287591<br>(0.000)         | -0.302***<br>(0.000)                                                                                                        | -.1312883<br>(0.000)         |
| <b>Awake2_LY</b> | -0.209***<br>(0.000)  | -.0967463<br>(0.000)           | -0.234***<br>(0.000)                                                         | -.0959131<br>(0.000)         | -0.214***<br>(0.000)                                                                          | -.0952338<br>(0.000)         | -0.216***<br>(0.000)                                                                                                        | -.0938763<br>(0.000)         |
| <b>Awake3_LY</b> | -0.634***<br>(0.000)  | -.2933218<br>(0.000)           | -0.723***<br>(0.000)                                                         | -.2960955<br>(0.000)         | -0.682***<br>(0.000)                                                                          | -.3034562<br>(0.000)         | -0.694***<br>(0.000)                                                                                                        | -.3022111<br>(0.000)         |
| <b>Eat2_LY</b>   | -0.126***<br>(0.000)  | -.0582052<br>(0.000)           | -0.149***<br>(0.000)                                                         | -.0609352<br>(0.000)         | -0.136***<br>(0.001)                                                                          | -.060538<br>(0.000)          | -0.138***<br>(0.001)                                                                                                        | -.0599877<br>(0.000)         |
| <b>Eat3_LY</b>   | -0.354***<br>(0.000)  | -.1636369<br>(0.000)           | -0.396***<br>(0.000)                                                         | -.1624236<br>(0.000)         | -0.353***<br>(0.000)                                                                          | -.1568854<br>(0.000)         | -0.357***<br>(0.000)                                                                                                        | -.1553178<br>(0.000)         |
| <b>Cry2_LY</b>   | -0.215***<br>(0.000)  | -.0994839<br>(0.000)           | -0.235***<br>(0.000)                                                         | -.0962163<br>(0.000)         | -0.209***<br>(0.000)                                                                          | -.0930287<br>(0.000)         | -0.220***<br>(0.000)                                                                                                        | -.0956501<br>(0.000)         |
| <b>Cry3_LY</b>   | -0.565***<br>(0.000)  | -.2615666<br>(0.000)           | -0.618***<br>(0.000)                                                         | -.2532607<br>(0.000)         | -0.580***<br>(0.000)                                                                          | -.2580093<br>(0.000)         | -0.584***<br>(0.000)                                                                                                        | -.2543272<br>(0.000)         |
| <b>LY</b>        | 2.160***<br>(0.000)   | -<br>-                         | 2.440***<br>(0.000)                                                          | -<br>-                       | 2.248***<br>(0.000)                                                                           | -<br>-                       | 2.298***<br>(0.000)                                                                                                         | -<br>-                       |

|                       |        |        |        |        |
|-----------------------|--------|--------|--------|--------|
| <b>Observations</b>   | 13,086 | 12,240 | 10,890 | 10,710 |
| <b>Log likelihood</b> | -3468  | -3118  | -2830  | -2760  |
| <b>Rho-squared</b>    | 0.235  | 0.265  | 0.250  | 0.256  |

---

Notes: p-values are in parentheses, where \*\*\* p<0.01, \*\* p<0.05, \* p<0.1. An underscore (\_) represents an interaction between variables i.e. Hurt2\_LY is Hurt2 multiplied by LY. Hurt2:my teeth hurt me a bit; Hurt3: my teeth hurt me a lot; Annoy2: my teeth annoy me a bit; Annoy3: my teeth annoy me a lot; Awake2: my teeth keep me awake a bit; Awake3: my teeth keep me awake a lot; Eat2: my teeth make it a bit hard to eat some foods; Eat3: my teeth make it really hard to eat some foods; Cry2: my teeth make me cry a bit; Cry3: my teeth make me cry a lot; LY: duration

**Table S15: Unanchored and anchored regression results exploring model robustness to exclusion of adult participants that had difficulty choosing a response to the DCE<sub>TTO</sub> tasks**

| <b>Variables</b>    | <b>Standard model</b> | <b>Standard model anchored</b> | <b>Robustness 4</b><br>Excluding participants that found it difficult to choose a response | <b>Robustness 4 anchored</b> | <b>Robustness 5</b><br>Excluding participants that found it difficult to choose a response and failed the dominance test | <b>Robustness 5 Anchored</b> |
|---------------------|-----------------------|--------------------------------|--------------------------------------------------------------------------------------------|------------------------------|--------------------------------------------------------------------------------------------------------------------------|------------------------------|
| <b>Hurt2_LY</b>     | -0.373***<br>(0.000)  | -.1728429<br>(0.000)           | -0.390***<br>(0.000)                                                                       | -.1762983<br>(0.000)         | -0.393***<br>(0.000)                                                                                                     | -.1761347<br>(0.000)         |
| <b>Hurt3_LY</b>     | -1.217***<br>(0.000)  | -.5635363<br>(0.000)           | -1.275***<br>(0.000)                                                                       | -.5755977<br>(0.000)         | -1.278***<br>(0.000)                                                                                                     | -.572701<br>(0.000)          |
| <b>Annoy2_LY</b>    | 0.009<br>(0.820)      | .004016<br>(0.821)             | -0.003<br>(0.945)                                                                          | -.0012436<br>(0.945)         | -0.008<br>(0.851)                                                                                                        | -.003385<br>(0.851)          |
| <b>Annoy3_LY</b>    | -0.262***<br>(0.000)  | -.1212449<br>(0.000)           | -0.285***<br>(0.000)                                                                       | -.1288312<br>(0.000)         | -0.291***<br>(0.000)                                                                                                     | -.1304021<br>(0.000)         |
| <b>Awake2_LY</b>    | -0.209***<br>(0.000)  | -.0967463<br>(0.000)           | -0.205***<br>(0.000)                                                                       | -.092646<br>(0.000)          | -0.203***<br>(0.000)                                                                                                     | -.0908825<br>(0.000)         |
| <b>Awake3_LY</b>    | -0.634***<br>(0.000)  | -.2933218<br>(0.000)           | -0.672***<br>(0.000)                                                                       | -.303432<br>(0.000)          | -0.674***<br>(0.000)                                                                                                     | -.3020873<br>(0.000)         |
| <b>Eat2_LY</b>      | -0.126***<br>(0.000)  | -.0582052<br>(0.000)           | -0.132***<br>(0.000)                                                                       | -.0594476<br>(0.000)         | -0.130***<br>(0.001)                                                                                                     | -.0581255<br>(0.000)         |
| <b>Eat3_LY</b>      | -0.354***<br>(0.000)  | -.1636369<br>(0.000)           | -0.363***<br>(0.000)                                                                       | -.1638541<br>(0.000)         | -0.363***<br>(0.000)                                                                                                     | -.1627197<br>(0.000)         |
| <b>Cry2_LY</b>      | -0.215***<br>(0.000)  | -.0994839<br>(0.000)           | -0.222***<br>(0.000)                                                                       | -.1003128<br>(0.000)         | -0.227***<br>(0.000)                                                                                                     | -.1018175<br>(0.000)         |
| <b>Cry3_LY</b>      | -0.565***<br>(0.000)  | -.2615666<br>(0.000)           | -0.598***<br>(0.000)                                                                       | -.2700924<br>(0.000)         | -0.599***<br>(0.000)                                                                                                     | -.2683327<br>(0.000)         |
| <b>LY</b>           | 2.160***<br>(0.000)   | -<br>-                         | 2.214***<br>(0.000)                                                                        |                              | 2.232***<br>(0.000)                                                                                                      |                              |
| <b>Observations</b> | 13,086                |                                | 12,348                                                                                     |                              | 12,222                                                                                                                   |                              |

|                       |       |       |       |
|-----------------------|-------|-------|-------|
| <b>Log likelihood</b> | -3468 | -3218 | -3180 |
| <b>Rho-squared</b>    | 0.235 | 0.248 | 0.249 |

---

Notes: p-values are in parentheses, where \*\*\* p<0.01, \*\* p<0.05, \* p<0.1. An underscore ( \_ ) represents an interaction between variables i.e. Hurt2\_LY is Hurt2 multiplied by LY. Hurt2:my teeth hurt me a bit; Hurt3: my teeth hurt me a lot; Annoy2: my teeth annoy me a bit; Annoy3: my teeth annoy me a lot; Awake2: my teeth keep me awake a bit; Awake3: my teeth keep me awake a lot; Eat2: my teeth make it a bit hard to eat some foods; Eat3: my teeth make it really hard to eat some foods; Cry2: my teeth make me cry a bit; Cry3: my teeth make me cry a lot; LY: duration



**Table S16: Unanchored and anchored regression results exploring model robustness to exclusion of adult participants that completed the DCE<sub>TO</sub> survey very quickly or very slowly**

| Variables             | Standard model       | Standard model anchored | Robustness 6<br>Excluding participants that completed the survey in < 3 mins | Robustness 6 anchored | Robustness 7<br>Excluding participants that completed the survey in > 30 mins | Robustness 7 anchored |
|-----------------------|----------------------|-------------------------|------------------------------------------------------------------------------|-----------------------|-------------------------------------------------------------------------------|-----------------------|
| <b>Hurt2_LY</b>       | -0.373***<br>(0.000) | -.1728429<br>(0.000)    | -0.400***<br>(0.000)                                                         | -.1793527<br>(0.000)  | -0.379***<br>(0.000)                                                          | -.175584<br>(0.000)   |
| <b>Hurt3_LY</b>       | -1.217***<br>(0.000) | -.5635363<br>(0.000)    | -1.266***<br>(0.000)                                                         | -.5679314<br>(0.000)  | -1.228***<br>(0.000)                                                          | -.5683242<br>(0.000)  |
| <b>Annoy2_LY</b>      | 0.009<br>(0.820)     | .004016<br>(0.821)      | 0.010<br>(0.803)                                                             | .0043796<br>(0.803)   | 0.010<br>(0.791)                                                              | .004768<br>(0.792)    |
| <b>Annoy3_LY</b>      | -0.262***<br>(0.000) | -.1212449<br>(0.000)    | -0.270***<br>(0.000)                                                         | -.1210805<br>(0.000)  | -0.262***<br>(0.000)                                                          | -.1213109<br>(0.000)  |
| <b>Awake2_LY</b>      | -0.209***<br>(0.000) | -.0967463<br>(0.000)    | -0.210***<br>(0.000)                                                         | -.0940191<br>(0.000)  | -0.205***<br>(0.000)                                                          | -.09466<br>(0.000)    |
| <b>Awake3_LY</b>      | -0.634***<br>(0.000) | -.2933218<br>(0.000)    | -0.657***<br>(0.000)                                                         | -.2946578<br>(0.000)  | -0.639***<br>(0.000)                                                          | -.2957129<br>(0.000)  |
| <b>Eat2_LY</b>        | -0.126***<br>(0.000) | -.0582052<br>(0.000)    | -0.124***<br>(0.001)                                                         | -.055495<br>(0.000)   | -0.130***<br>(0.000)                                                          | -.060248<br>(0.000)   |
| <b>Eat3_LY</b>        | -0.354***<br>(0.000) | -.1636369<br>(0.000)    | -0.358***<br>(0.000)                                                         | -.1603906<br>(0.000)  | -0.356***<br>(0.000)                                                          | -.164553<br>(0.000)   |
| <b>Cry2_LY</b>        | -0.215***<br>(0.000) | -.0994839<br>(0.000)    | -0.217***<br>(0.000)                                                         | -.0972072<br>(0.000)  | -0.216***<br>(0.000)                                                          | -.1001281<br>(0.000)  |
| <b>Cry3_LY</b>        | -0.565***<br>(0.000) | -.2615666<br>(0.000)    | -0.590***<br>(0.000)                                                         | -.2645564<br>(0.000)  | -0.566***<br>(0.000)                                                          | -.2621079<br>(0.000)  |
| <b>LY</b>             | 2.160***<br>(0.000)  | -<br>-                  | 2.229***<br>(0.000)                                                          | -<br>-                | 2.161***<br>(0.000)                                                           | -<br>-                |
| <b>Observations</b>   | 13,086               |                         | 12,798                                                                       |                       | 12,618                                                                        |                       |
| <b>Log likelihood</b> | -3468                |                         | -3346                                                                        |                       | -3342                                                                         |                       |
| <b>Rho-squared</b>    | 0.235                |                         | 0.246                                                                        |                       | 0.236                                                                         |                       |

Notes: p-values are in parentheses, where \*\*\* p<0.01, \*\* p<0.05, \* p<0.1. An underscore (\_) represents an interaction between variables i.e. Hurt2\_LY is Hurt2 multiplied by LY. Hurt2:my teeth hurt me a bit; Hurt3: my teeth hurt me a lot; Annoy2: my teeth annoy me a bit; Annoy3: my teeth annoy me a lot;

---

Awake2: my teeth keep me awake a bit; Awake3: my teeth keep me awake a lot; Eat2: my teeth make it a bit hard to eat some foods; Eat3: my teeth make it really hard to eat some foods; Cry2: my teeth make me cry a bit; Cry3: my teeth make me cry a lot; LY: duration

**Table S17: Adult and adolescent derived utilities for each health state defined by the CARIES-QC-U classification system**

| <b>Health state</b> | <b>Adult value set</b> | <b>Adolescent value set</b> | <b>Health state</b> | <b>Adult value set</b> | <b>Adolescent value set</b> |
|---------------------|------------------------|-----------------------------|---------------------|------------------------|-----------------------------|
| 11111               | 1.000                  | 1.015                       | 22223               | 0.412                  | 0.453                       |
| 11112               | 1.000                  | 0.937                       | 22231               | 0.411                  | 0.270                       |
| 11113               | 0.942                  | 0.946                       | 22232               | 0.411                  | 0.133                       |
| 11121               | 0.942                  | 0.861                       | 22233               | 0.403                  | 0.369                       |
| 11122               | 0.903                  | 0.903                       | 22311               | 0.403                  | 0.238                       |
| 11123               | 0.903                  | 0.814                       | 22312               | 0.388                  | 0.481                       |
| 11131               | 0.901                  | 0.876                       | 22313               | 0.388                  | 0.358                       |
| 11132               | 0.901                  | 0.785                       | 22321               | 0.385                  | 0.230                       |
| 11133               | 0.877                  | 0.877                       | 22322               | 0.380                  | 0.634                       |
| 11211               | 0.845                  | 0.823                       | 22323               | 0.380                  | 0.522                       |
| 11212               | 0.845                  | 0.727                       | 22331               | 0.377                  | 0.340                       |
| 11213               | 0.843                  | 0.795                       | 22332               | 0.377                  | 0.207                       |
| 11221               | 0.843                  | 0.696                       | 22333               | 0.371                  | 0.473                       |
| 11222               | 0.836                  | 0.891                       | 23111               | 0.371                  | 0.349                       |
| 11223               | 0.836                  | 0.801                       | 23112               | 0.356                  | 0.244                       |
| 11231               | 0.827                  | 0.836                       | 23113               | 0.353                  | 0.341                       |
| 11232               | 0.827                  | 0.741                       | 23121               | 0.347                  | 0.159                       |
| 11233               | 0.819                  | 0.796                       | 23122               | 0.345                  | 0.085                       |
| 11311               | 0.804                  | 0.745                       | 23123               | 0.341                  | 0.577                       |
| 11312               | 0.804                  | 0.642                       | 23131               | 0.341                  | 0.461                       |
| 11313               | 0.780                  | 0.746                       | 23132               | 0.339                  | 0.542                       |
| 11321               | 0.778                  | 0.715                       | 23133               | 0.339                  | 0.424                       |
| 11322               | 0.769                  | 0.751                       | 23211               | 0.323                  | 0.382                       |
| 11323               | 0.769                  | 0.649                       | 23212               | 0.321                  | 0.315                       |
| 11331               | 0.746                  | 0.652                       | 23213               | 0.315                  | 0.544                       |
| 11332               | 0.746                  | 0.542                       | 23221               | 0.312                  | 0.233                       |
| 11333               | 0.739                  | 0.762                       | 23222               | 0.306                  | 0.182                       |

|       |       |       |       |       |        |
|-------|-------|-------|-------|-------|--------|
| 12111 | 0.739 | 0.660 | 23223 | 0.306 | 0.039  |
| 12112 | 0.739 | 0.782 | 23231 | 0.288 | 0.030  |
| 12113 | 0.739 | 0.682 | 23232 | 0.283 | 0.473  |
| 12121 | 0.737 | 0.731 | 23233 | 0.283 | 0.350  |
| 12122 | 0.737 | 0.627 | 23311 | 0.283 | 0.402  |
| 12123 | 0.730 | 0.699 | 23312 | 0.283 | 0.274  |
| 12131 | 0.730 | 0.593 | 23313 | 0.281 | 0.436  |
| 12132 | 0.728 | 0.667 | 23321 | 0.281 | 0.310  |
| 12133 | 0.728 | 0.558 | 23322 | 0.280 | 0.140  |
| 12211 | 0.722 | 0.654 | 23323 | 0.274 | 0.562  |
| 12212 | 0.720 | 0.621 | 23331 | 0.274 | 0.445  |
| 12213 | 0.713 | 0.733 | 23332 | 0.274 | 0.323  |
| 12221 | 0.707 | 0.860 | 23333 | 0.274 | 0.190  |
| 12222 | 0.707 | 0.767 | 31111 | 0.272 | 0.255  |
| 12223 | 0.704 | 0.669 | 31112 | 0.272 | 0.117  |
| 12231 | 0.681 | 0.563 | 31113 | 0.265 | 0.266  |
| 12232 | 0.681 | 0.693 | 31121 | 0.257 | 0.437  |
| 12233 | 0.681 | 0.586 | 31122 | 0.254 | 0.108  |
| 12311 | 0.672 | 0.604 | 31123 | 0.248 | 0.256  |
| 12312 | 0.672 | 0.490 | 31131 | 0.242 | 0.372  |
| 12313 | 0.670 | 0.570 | 31132 | 0.242 | 0.241  |
| 12321 | 0.670 | 0.453 | 31133 | 0.218 | 0.373  |
| 12322 | 0.664 | 0.686 | 31211 | 0.216 | 0.334  |
| 12323 | 0.664 | 0.578 | 31212 | 0.215 | 0.204  |
| 12331 | 0.649 | 0.777 | 31213 | 0.215 | 0.062  |
| 12332 | 0.649 | 0.677 | 31221 | 0.184 | 0.255  |
| 12333 | 0.646 | 0.571 | 31222 | 0.184 | 0.117  |
| 13111 | 0.642 | 0.639 | 31223 | 0.183 | -0.067 |
| 13112 | 0.642 | 0.527 | 31231 | 0.178 | 0.394  |
| 13113 | 0.640 | 0.582 | 31232 | 0.178 | 0.265  |
| 13121 | 0.640 | 0.466 | 31233 | 0.177 | 0.420  |

---

|       |       |       |       |       |        |
|-------|-------|-------|-------|-------|--------|
| 13122 | 0.631 | 0.510 | 31311 | 0.177 | 0.293  |
| 13123 | 0.631 | 0.389 | 31312 | 0.175 | 0.355  |
| 13131 | 0.623 | 0.458 | 31313 | 0.175 | 0.223  |
| 13132 | 0.616 | 0.583 | 31321 | 0.160 | 0.257  |
| 13133 | 0.616 | 0.606 | 31322 | 0.160 | 0.177  |
| 13211 | 0.614 | 0.548 | 31323 | 0.158 | 0.215  |
| 13212 | 0.608 | 0.695 | 31331 | 0.151 | 0.356  |
| 13213 | 0.608 | 0.588 | 31332 | 0.151 | 0.090  |
| 13221 | 0.607 | 0.512 | 31333 | 0.149 | 0.014  |
| 13222 | 0.605 | 0.475 | 32111 | 0.145 | 0.521  |
| 13223 | 0.584 | 0.696 | 32112 | 0.145 | 0.401  |
| 13231 | 0.584 | 0.539 | 32113 | 0.119 | 0.144  |
| 13232 | 0.584 | 0.420 | 32121 | 0.119 | 0.306  |
| 13233 | 0.575 | 0.624 | 32122 | 0.119 | 0.171  |
| 13311 | 0.575 | 0.511 | 32123 | 0.110 | 0.113  |
| 13312 | 0.573 | 0.402 | 32131 | 0.110 | -0.034 |
| 13313 | 0.573 | 0.273 | 32132 | 0.092 | -0.043 |
| 13321 | 0.567 | 0.531 | 32133 | 0.087 | 0.414  |
| 13322 | 0.567 | 0.411 | 32211 | 0.087 | 0.286  |
| 13323 | 0.566 | 0.555 | 32212 | 0.080 | 0.238  |
| 13331 | 0.566 | 0.437 | 32213 | 0.080 | 0.099  |
| 13332 | 0.564 | 0.495 | 32221 | 0.078 | 0.166  |
| 13333 | 0.564 | 0.372 | 32222 | 0.078 | 0.023  |
| 21111 | 0.558 | 0.504 | 32223 | 0.061 | 0.014  |
| 21112 | 0.550 | 0.599 | 32231 | 0.055 | 0.168  |
| 21113 | 0.550 | 0.485 | 32232 | 0.054 | 0.197  |
| 21121 | 0.549 | 0.403 | 32233 | 0.052 | 0.125  |
| 21122 | 0.547 | 0.365 | 32311 | 0.046 | 0.309  |
| 21123 | 0.544 | 0.713 | 32312 | 0.046 | 0.174  |
| 21131 | 0.544 | 0.607 | 32313 | 0.022 | 0.311  |
| 21132 | 0.541 | 0.496 | 32321 | 0.022 | 0.113  |

---

|       |       |       |       |        |        |
|-------|-------|-------|-------|--------|--------|
| 21133 | 0.535 | 0.648 | 32322 | 0.022  | -0.033 |
| 21211 | 0.535 | 0.537 | 32323 | 0.014  | 0.220  |
| 21212 | 0.526 | 0.601 | 32331 | 0.014  | 0.079  |
| 21213 | 0.519 | 0.443 | 32332 | -0.004 | 0.071  |
| 21221 | 0.517 | 0.378 | 32333 | -0.012 | 0.189  |
| 21222 | 0.508 | 0.298 | 33111 | -0.012 | 0.046  |
| 21223 | 0.508 | 0.449 | 33112 | -0.013 | -0.143 |
| 21231 | 0.508 | 0.324 | 33113 | -0.018 | 0.332  |
| 21232 | 0.485 | 0.507 | 33121 | -0.018 | 0.198  |
| 21233 | 0.478 | 0.462 | 33122 | -0.036 | 0.190  |
| 21311 | 0.478 | 0.338 | 33123 | -0.043 | -0.005 |
| 21312 | 0.476 | 0.549 | 33131 | -0.045 | -0.084 |
| 21313 | 0.476 | 0.430 | 33132 | -0.077 | 0.074  |
| 21321 | 0.470 | 0.386 | 33133 | -0.083 | 0.019  |
| 21322 | 0.470 | 0.256 | 33211 | -0.083 | -0.133 |
| 21323 | 0.467 | 0.319 | 33212 | -0.101 | -0.142 |
| 21331 | 0.467 | 0.185 | 33213 | -0.109 | -0.025 |
| 21332 | 0.461 | 0.330 | 33221 | -0.115 | 0.171  |
| 21333 | 0.452 | 0.426 | 33222 | -0.115 | 0.028  |
| 22111 | 0.450 | 0.177 | 33223 | -0.118 | 0.097  |
| 22112 | 0.446 | 0.585 | 33231 | -0.118 | -0.050 |
| 22113 | 0.446 | 0.469 | 33232 | -0.135 | -0.059 |
| 22121 | 0.444 | 0.526 | 33233 | -0.141 | 0.099  |
| 22122 | 0.444 | 0.406 | 33311 | -0.174 | 0.042  |
| 22123 | 0.444 | 0.321 | 33312 | -0.174 | -0.108 |
| 22131 | 0.443 | 0.348 | 33313 | -0.206 | -0.246 |
| 22132 | 0.441 | 0.281 | 33321 | -0.238 | -0.079 |
| 22133 | 0.438 | 0.728 | 33322 | -0.240 | -0.160 |
| 22211 | 0.438 | 0.623 | 33323 | -0.279 | -0.054 |
| 22212 | 0.435 | 0.452 | 33331 | -0.279 | -0.210 |
| 22213 | 0.435 | 0.327 | 33332 | -0.297 | -0.220 |

---

|       |       |       |       |        |        |
|-------|-------|-------|-------|--------|--------|
| 22221 | 0.427 | 0.398 | 33333 | -0.402 | -0.326 |
| 22222 | 0.421 | 0.527 |       |        |        |

Notes: \* The utility for this health state was predicted to be above 1, so has been capped at 1.
